# Supplementary material for: Porous graphene-based materials by thermolytic cracking
Source: Royal Society of Chemistry journal article supplement (doi:10.1039/c1jm13947a), 2011-11-23
Supplement: c1jm13947a.pdf [file c1jm13947a.pdf]

## Electronic Supplementary Information: Porous Graphene-Based Materials by Thermolytic Cracking

Deqin Fan,<sup>a,b</sup> Ying Liu,<sup>a</sup> Junpo He,<sup>\*a</sup> Yanwu Zhou<sup>a</sup> and Yuliang Yang<sup>a</sup>

**Table S1.** Number average diameters,  $D_n$ s, and distributions,  $PDI$ s, of PS-*in*-RGOs from statistics of OM.

| PVP con. (%) | GO con. (%)       | $D_n(\mu\text{m})$ | $PDI^d$        |
|--------------|-------------------|--------------------|----------------|
| 1.60         | 0                 | - <sup>a</sup>     | - <sup>a</sup> |
| 0            | 0.01              | - <sup>b</sup>     | - <sup>b</sup> |
| 0.53         | 0.01              | 5.78               | 1.140          |
| 1.00         | 0.01              | 4.98               | 1.148          |
| 1.60         | 0.01              | 3.53               | 1.165          |
| 2.20         | 0.01              | 2.81               | 1.203          |
| 1.60         | 0.25              | 3.17               | 1.165          |
| 1.60         | 0.50              | 3.24               | 1.349          |
| 1.60         | 0.01 <sup>c</sup> | 3.65               | 1.188          |
| 1.60         | 0.25 <sup>c</sup> | 2.93               | 1.170          |
| 1.60         | 0.50 <sup>c</sup> | 3.10               | 1.426          |

<sup>a.</sup> Unable to precisely be determined due to limited resolution of the optical microscopy.

<sup>b.</sup> Serious coagulum observed.

<sup>c.</sup> The data is from the samples after chemical reduction reaction.

<sup>d.</sup> The average diameter  $D_n$  and polydispersity index  $PDI$  were calculated according to:

$$D_n = \sum_{i=1}^n d_i/n, D_w = \sum_{i=1}^n d_i^4 / \sum_{i=1}^n d_i^3, PDI = \frac{D_w}{D_n},$$

where  $n$  is the number of counted particles and  $d_i$  is the diameter of the individual particle.

**Table S2.** Raman intensity ratios of graphite, RGO and PS-*in*-RGOs.

| Sample              | $I_D/I_G$ |
|---------------------|-----------|
| Graphite            | 0.21      |
| PS- <i>in</i> -RGO1 | 1.47      |
| PS- <i>in</i> -RGO2 | 1.46      |
| PS- <i>in</i> -RGO3 | 1.49      |
| RGO                 | 1.61      |

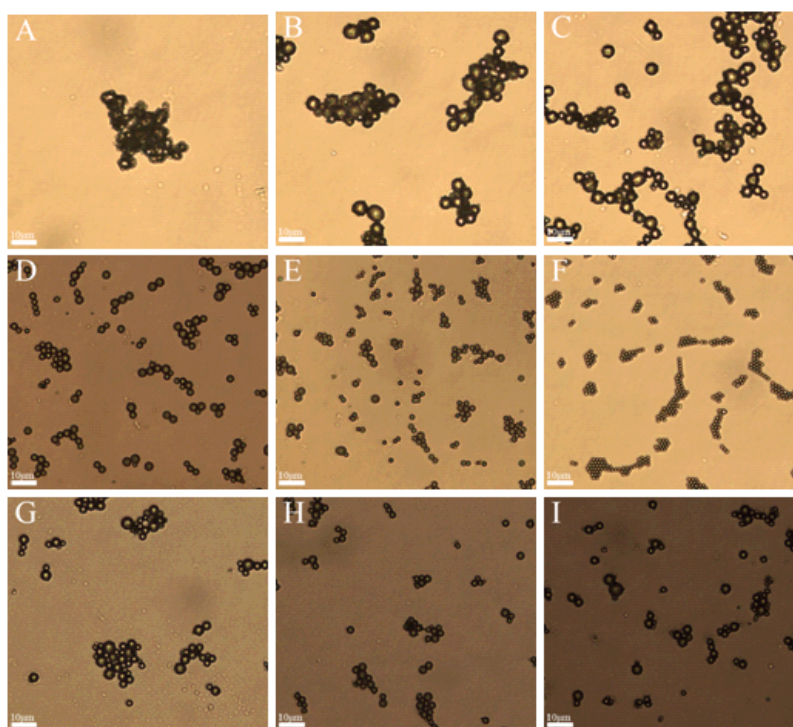

**Fig. S1** Optical images of the PS-*in*-GO on glass slide with PVP concentration at (A) 0%, (B) 0.53%, (C) 1.06%, (D) 1.60%, (E) 2.20% at 0.01% GO; (F) standard control polystyrene microspheres; PS-*in*-RGOs with GO concentration at (G) 0.01%, (H) 0.25%, (I) 0.50% at 1.60% PVP. The scale bars are 10  $\mu\text{m}$ .

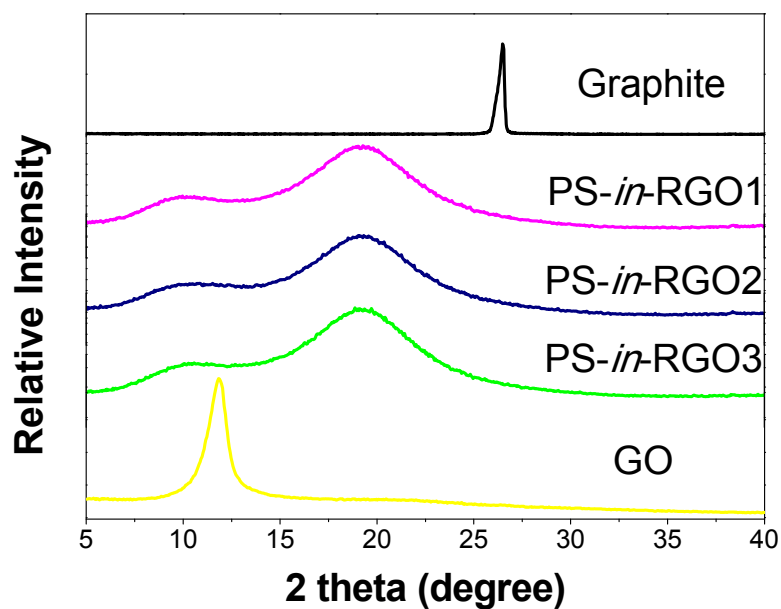

**Fig. S2** XRD spectra of GO, PS-*in*-RGOs and graphite.

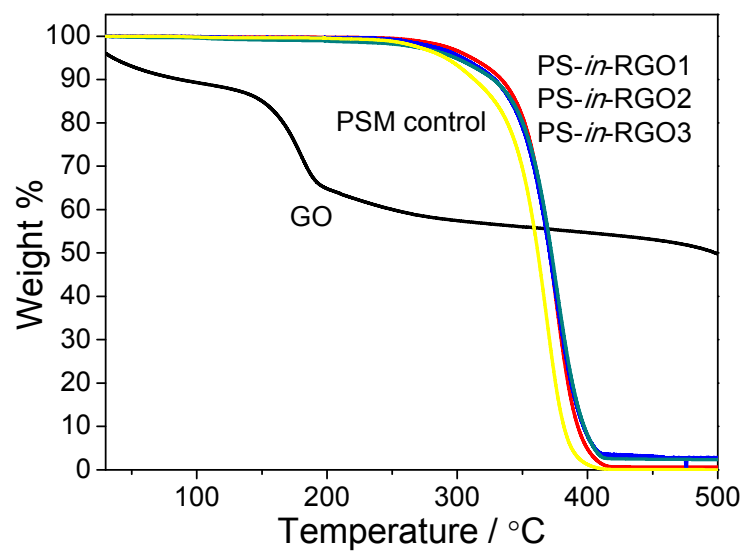

**Fig. S3** TGA curves of GO, PS-*in*-RGOs and control polystyrene microspheres (PSM) prepared in the absence of GO.

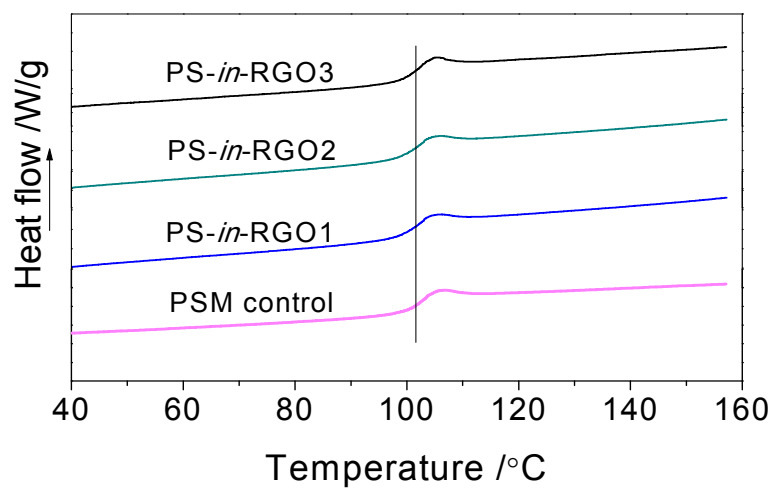

**Fig. S4** DSC curves of PS-*in*-RGOs and control polystyrene microspheres (PSM) prepared in the absence of GO.

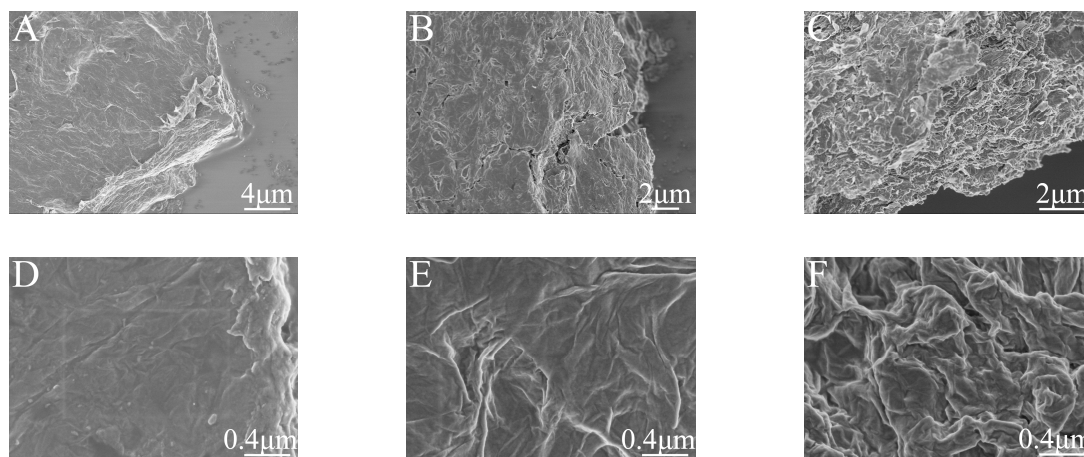

**Fig. S5** SEM images of recycled RGO by solvent abstract of PS-*in*-RGO1 (A, D), PS-*in*-RGO2 (B, E) and PS-*in*-RGO3 (C, F).

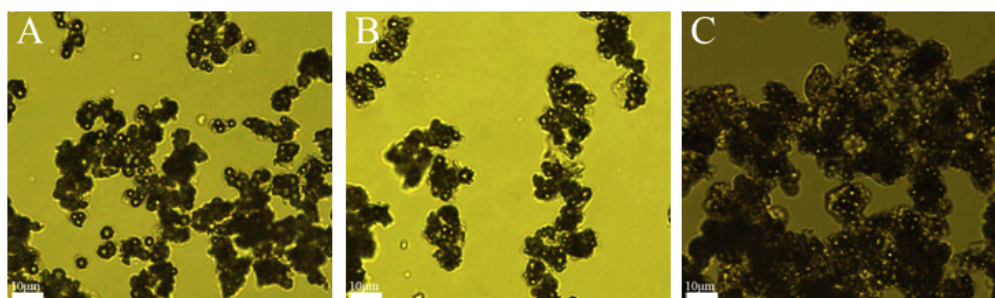

**Fig. S6** Optical images of (A) PS-*in*-GO/SiO<sub>2</sub>1, (B) PS-*in*-GO/SiO<sub>2</sub>2 and (C) PS-*in*-GO/SiO<sub>2</sub>3.

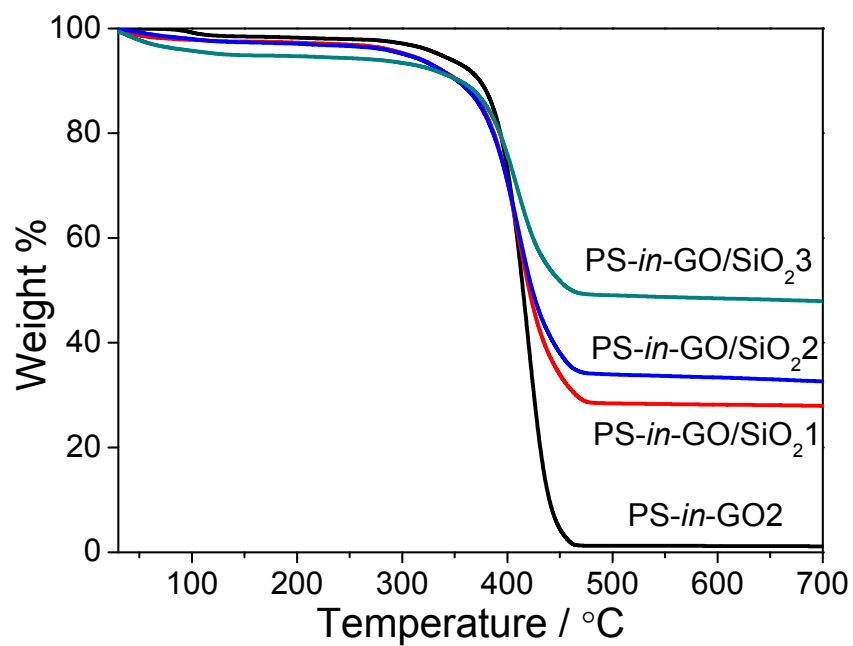

**Fig. S7** TGA curves of (A) PS-*in*-GO<sub>2</sub>, (B) PS-*in*-GO/SiO<sub>2</sub>1, (C) PS-*in*-GO/SiO<sub>2</sub>2 and (D) PS-*in*-GO/SiO<sub>2</sub>3.
